# Supplementary material for: A clinically authentic mouse model of enterovirus 71 (EV-A71)-induced neurogenic pulmonary oedema
Source: PubMed Central journal article supplement (PMC4928123; doi:10.1038/srep28876), 2016-06-30
Supplement: srep28876-s1.pdf [file srep28876-s1.pdf]

1 **Supporting Information for**

2  
3 **A clinically authentic mouse model of enterovirus 71 (EV-A71)-induced**  
4 **neurogenic pulmonary oedema**

5  
6 **Authors:** Carla Bianca Luena Victorio, Yishi Xu, Qimei Ng, Beng Hooi Chua, Sylvie Alonso,  
7 Vincent T.K. Chow\*, Kaw Bing Chua\*

8  
9 \*To whom correspondence should be addressed. E-mail: VTC ([vincent\\_chow@nuhs.edu.sg](mailto:vincent_chow@nuhs.edu.sg));  
10 KBC ([chuakb@tll.org.sg](mailto:chuakb@tll.org.sg))

11  
12 **This file includes:**

13  
14 **Movie S1.** Hallmark observations in EV71:TLLmv-infected mice presenting Class-IA signs  
15 of disease

16 **Movie S2.** Hallmark observations in EV71:TLLmv-infected mice presenting Class-IB signs  
17 of disease

18 **Figure S1.** Seroconversion in mice inoculated (I.P.) with various EV-A71 strains

19 **Figure S2.** Median humane endpoint (HD<sub>50</sub>) of EV71:TLLmv in one-week-old mice

20 **Figure S3.** Seroconversion observed in animals inoculated with EV71:TLLmv

21 **Figure S4.** Reproducible distribution of EV71:TLLmv-infected mice into different classes

22 **Figure S5.** Absence of viral replication and inflammation in the lung and heart tissues of  
23 Class-IA mice

24 **Figure S6.** Lesions and viral antigens observed in brain tissue sections of EV71:TLLmv-  
25 infected mice

26 **Figure S7.** Viral antigen and lesion localization in NPE trigger zones in the caudal brainstem

27 **Figure S8.** Representative images of brain coronal sections from mock-inoculated healthy  
28 mice

29 **Figure S9.** Comparable histopathology and viral antigen distribution between Class-IA and  
30 Class-IB mice brains

31 **Figure S10.** Lesions and viral antigens observed in spinal cord sections of EV71:TLLmv-  
32 infected mice

33 **Figure S11.** Viral replication in the limb muscles evident in I.M.-inoculated mice

34

35

36

37

38

39

40

41

42

43

44

45

46 **SUPPLEMENTARY VIDEOS**

47

48 **Movie S1**

49 **Hallmark observations in EV71:TLLmv-infected mice presenting Class-IA signs of disease**

50 This video is comprised of two video clips from two different Class-IA mice. Both animals were  
51 unable to self-right and were in a state of coma. Severe respiratory distress presenting as tachypnea  
52 with subcostal recession is evident in the first mouse. Gaspings, subcostal recession and a frothy  
53 fluid emanating from the nostrils can be seen in the second mouse.

54

55 **Movie S2**

56 **Hallmark observations in EV71:TLLmv-infected mice presenting Class-IB signs of disease**

57 The animal shown in the video prior to necropsy was unable to self-right and was in a state of  
58 stupor. Ipsilateral paralysis of the right limbs and persistent tremor of the left hind-limb were also  
59 observed.

60

61

62

63

64

65

66

67

## SUPPLEMENTARY FIGURES

68

69 **Figure S1**

70

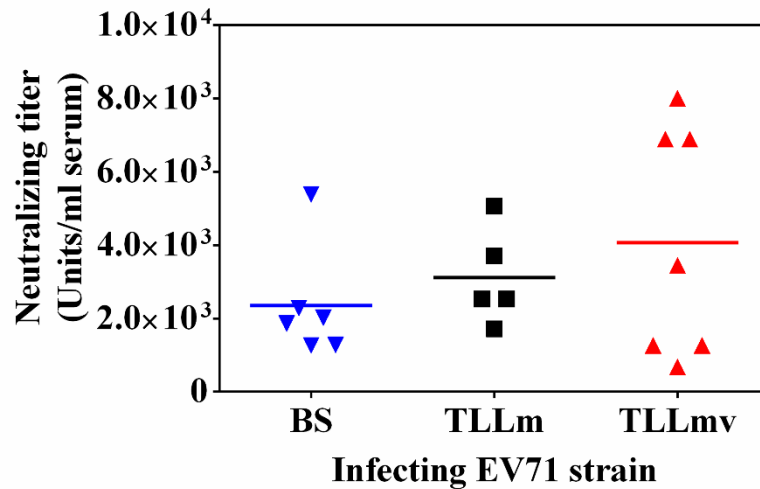

71

72

### 73 **Seroconversion in mice inoculated (I.P.) with various EV-A71 strains**

74 Neutralizing antibody titers in terminally collected sera from 1-week-old mice inoculated with

75 different virus strains. Virus neutralization tests were performed using Vero cells for assessment

76 of neutralization titers against EV71:BS; and NIH/3T3 cells for assessment of neutralization titers

77 against EV71:TLLm and EV71:TLLmv. Points represent individual titre values, while lines

78 indicate mean titre values.

79

80

81

82

83

84 **Figure S2**

85

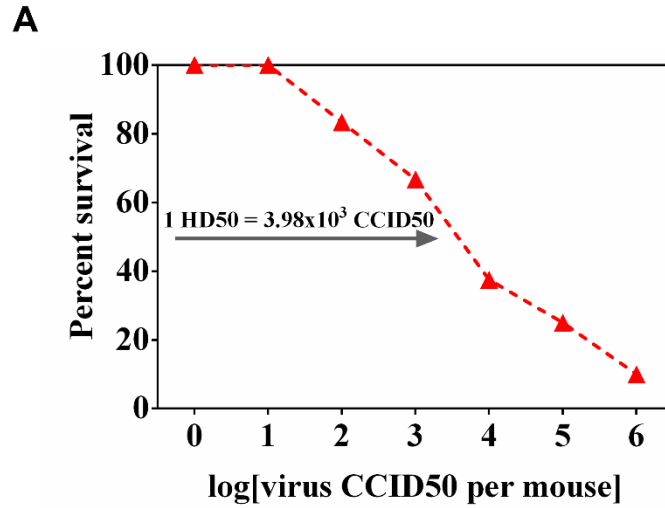

86

87

88 **Median humane endpoint (HD<sub>50</sub>) of EV71:TLLmv in one-week-old mice**

89 The HD<sub>50</sub> value, which refers to the virus dose that induces signs requiring euthanasia in half of  
90 the inoculated animals, was determined by inoculating (I.P.) mice with varying doses of  
91 EV71:TLLmv. The calculated HD<sub>50</sub> value was equivalent to a virus dose of  $3.98 \times 10^3$  CCID<sub>50</sub>

92

93

94

95

96

97

98

99

100

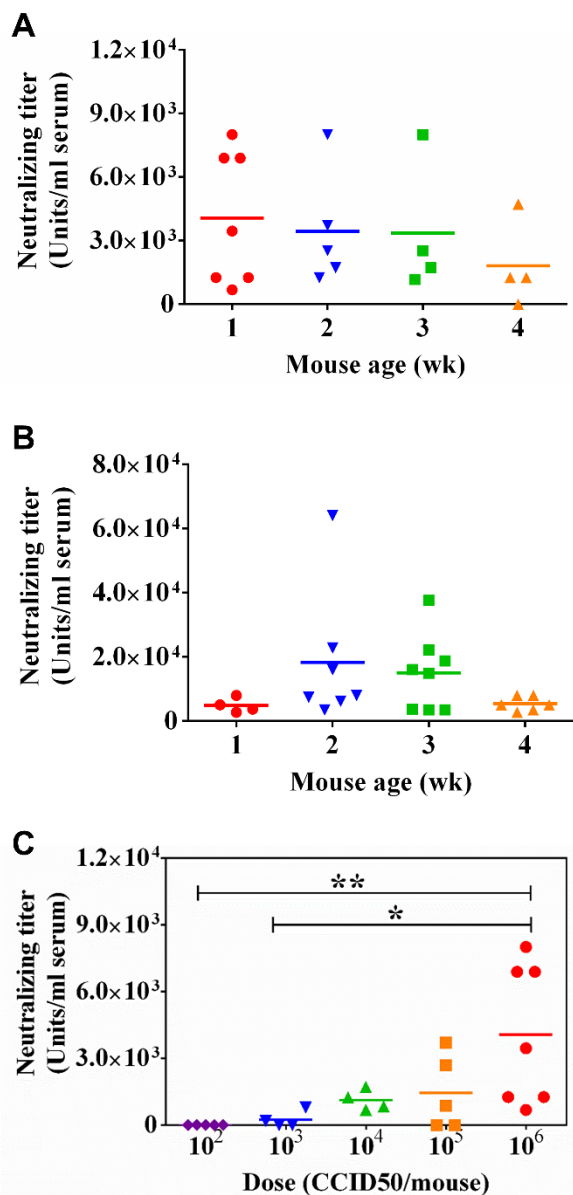

102

103

104 **Seroconversion observed in animals inoculated with EV71:TLLmv**

105 (A-B) Neutralizing antibody titres in terminally collected sera from mice of various ages (1-4

106 weeks) inoculated with  $10^6$  CCID<sub>50</sub> virus either via I.P. (A) or I.M. (B) injection. (C) Neutralizing

107 antibody titres in terminally collected sera from 1 week-old-mice inoculated (I.P.) with various

108 doses of virus. Mean titre values were compared using *t*-test. \*  $p < 0.05$ ; \*\*  $p < 0.005$ .

109 **Figure S4**

110

111

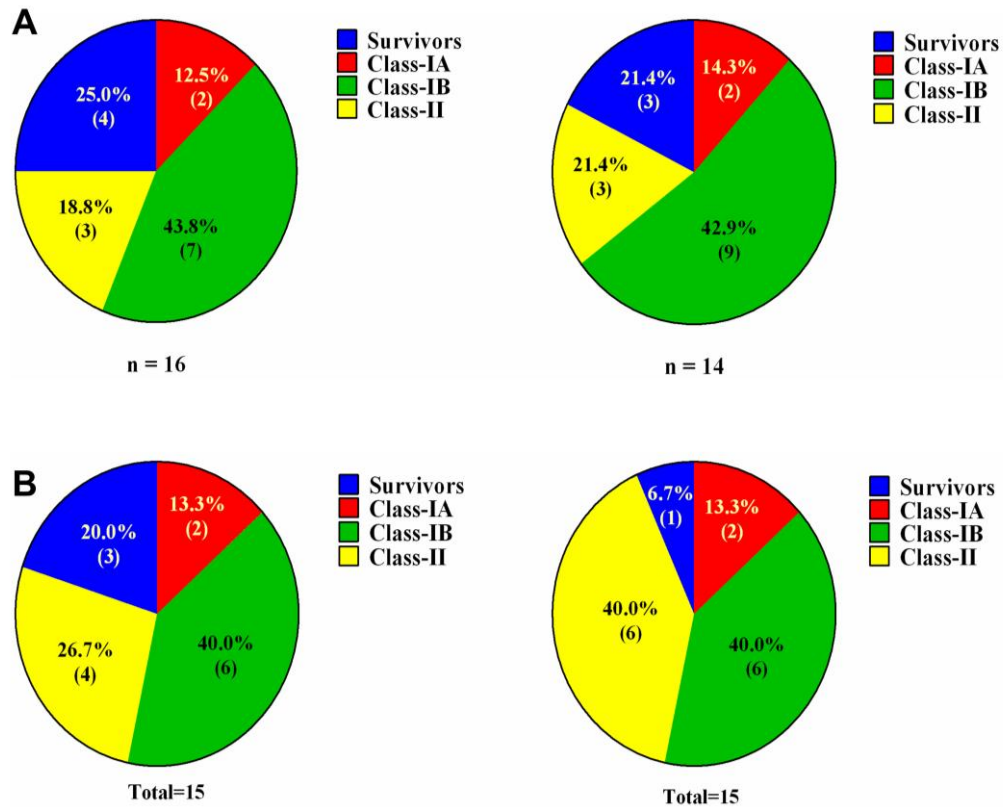

112

113

114

115 **Reproducible distribution of EV71:TLLmv-infected mice into different classes**

116 Distribution of mice inoculated either (A) I.P. or (B) I.M. with EV71:TLLmv into various classes

117 of clinical presentation derived from two independent experiments. Each experiment was

118 comprised of mice collected from two separate litters.

119

120

121

122 **Figure S5**

123

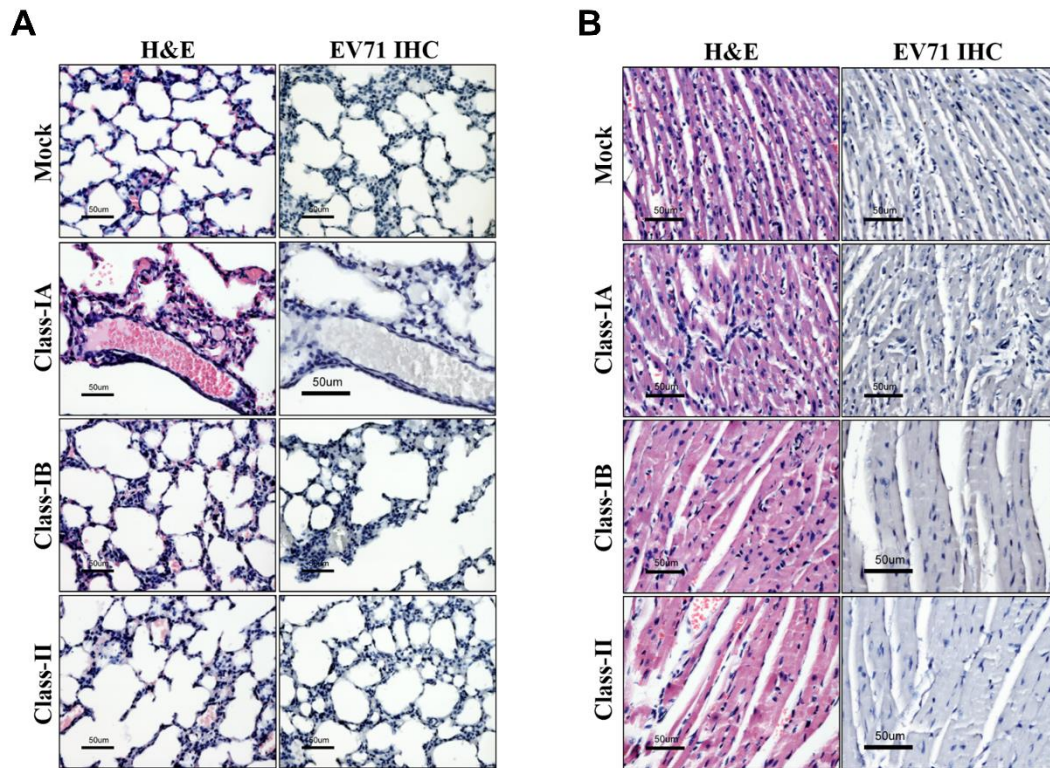

124

125

126 **Absence of viral replication and inflammation in the lung and heart tissues of Class-IA mice**

127 Representative images of lung tissue cross sections (5µm) (A) and heart tissue longitudinal

128 sections (5µm) (B) stained with Hematoxylin & Eosin (H&E) for histopathological examination;

129 or labelled with anti-EV-A71 serum (EV71 IHC) for virus antigen localization. *Mock*, control

130 tissues from sham-inoculated mice.

131

132

133

134



135 **Figure S6**

136

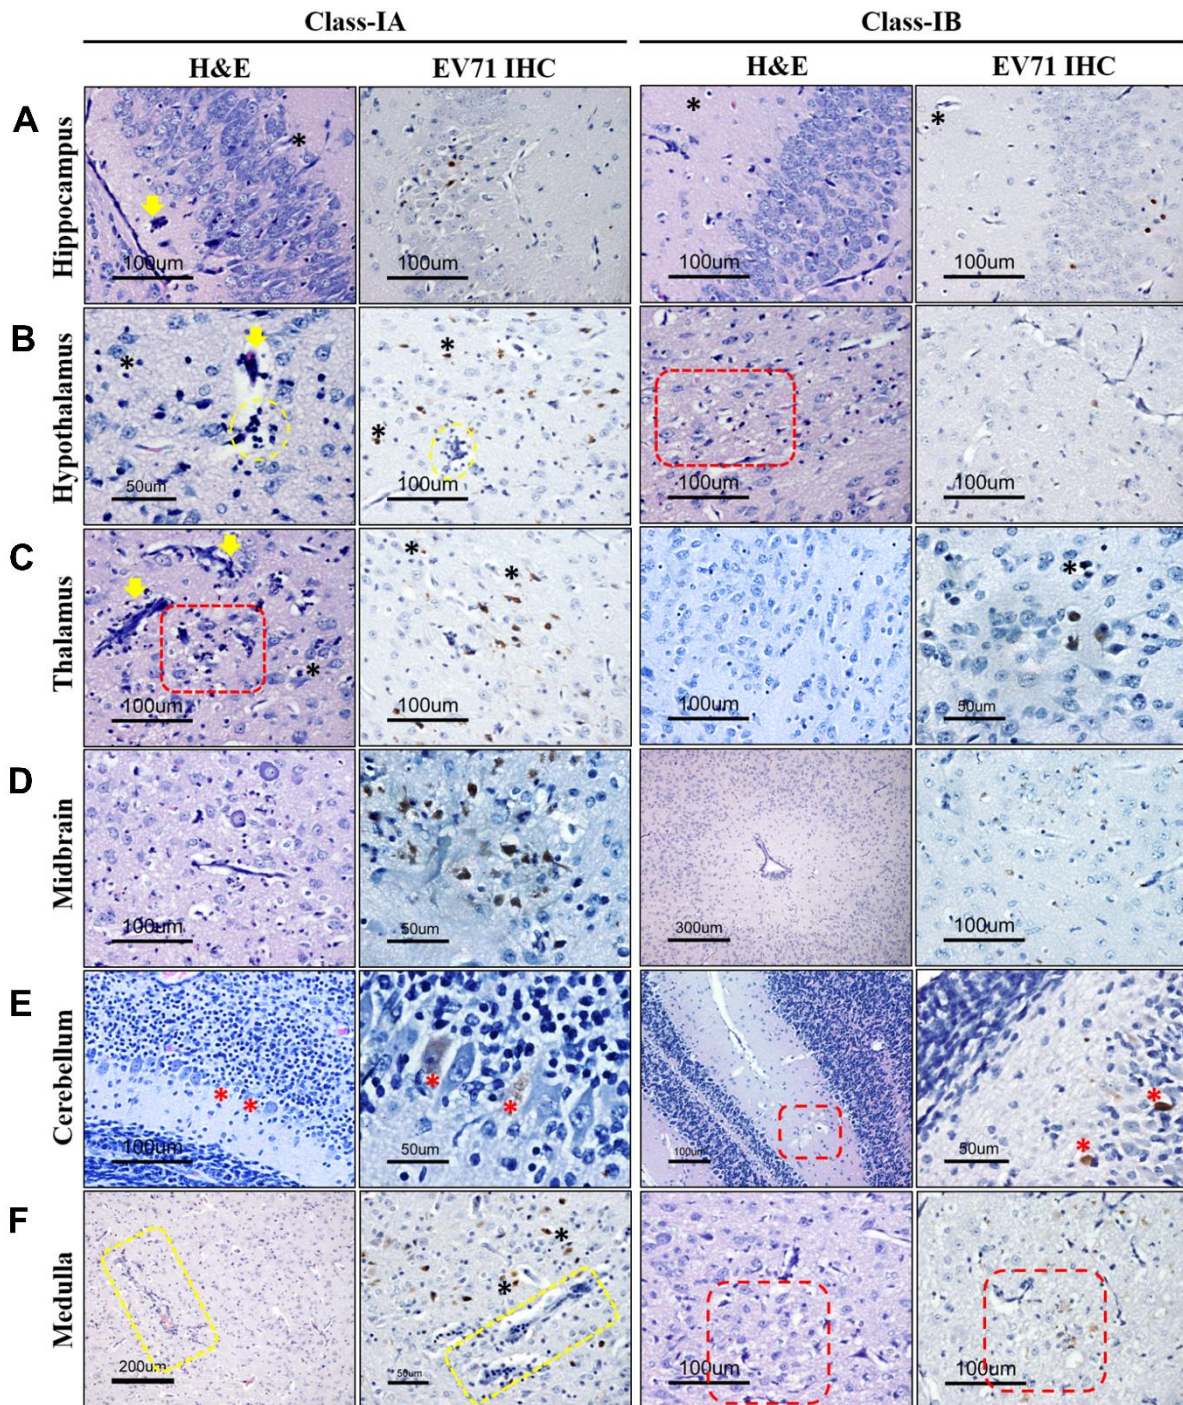

137

138

139 **Lesions and viral antigens observed in brain tissue sections of EV71:TLLmv-infected mice**  
140 Representative images of brain coronal sections (5µm) of hippocampus (**A**), hypothalamus (**B**),  
141 thalamus (**C**), midbrain (**D**), cerebellum (**E**), and medulla (**F**) derived from Class-IA (left panels)  
142 and Class-IB (right panels) mice. Sections were stained with Hematoxylin & Eosin (H&E) for  
143 histopathological examination; or labelled with anti-EV-A71 sera (EV71 IHC) for virus antigen  
144 localization. Pathological lesions observed include edema (*red box*), infiltrating immune cells  
145 (*yellow box*), neuronophagia (*yellow arrows*), neurodegeneration (*black asterisks*), and  
146 degeneration of Purkinje cells (*red asterisks*).

147

148

149

150

151

152

153

154

155

156

157

158

159

160

161

162 **Figure S7**

163

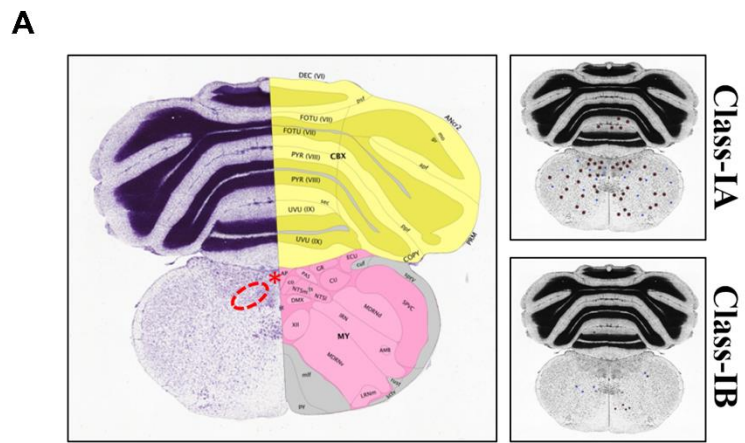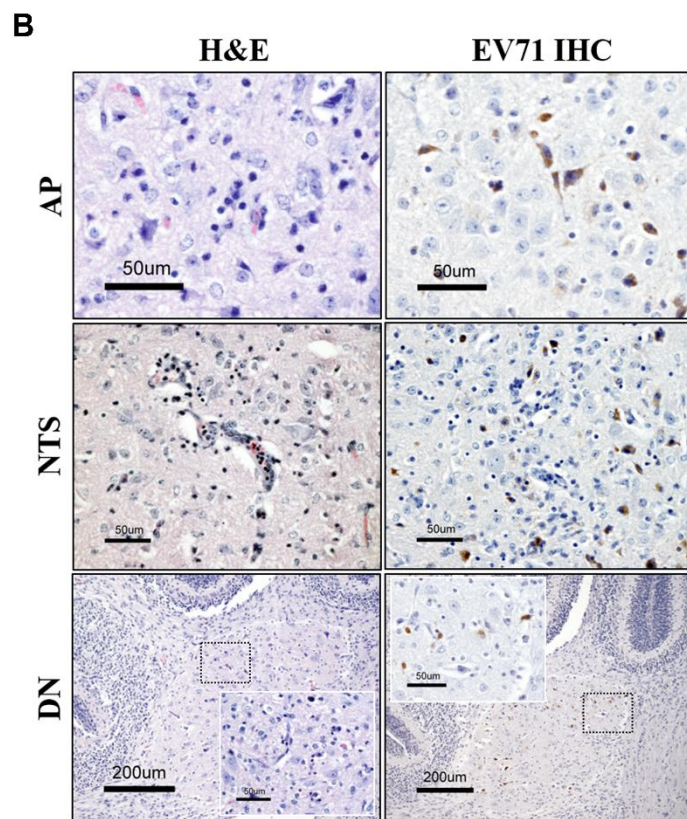

164

165

166

167 **Viral antigen and lesion localization in NPE trigger zones in the caudal brainstem**

168 (A) Schematic diagram of a coronal section through the caudal brainstem (*left panel*) marked to  
169 exhibit the localization of viral antigens (*brown dots*) and lesions (*blue dots*) in Class-IA and Class-  
170 IB brains (*right panels*). Template images were downloaded from The Mouse Brain Atlas and  
171 depict the location of the AP (*red asterisk*) and NTS (*red circle*). (B) Representative images of  
172 coronal sections through the caudal brainstem of Class-IA mice depicting the AP (area postrema),  
173 NTS (nucleus of the solitary tract), and DN (dentate nucleus). Tissue sections (5  $\mu$ m) were stained  
174 with Hematoxylin & Eosin (H&E) for histopathological examination, or labelled with anti-EV-  
175 A71 sera (EV71 IHC) for virus antigen localization. Boxed areas are shown magnified in the inset.  
176 *CBX*, cerebellar cortex; *MY*, medulla oblongata.

177

178

179

180

181

182

183

184

185

186

187

188

189

190 **Figure S8**

191

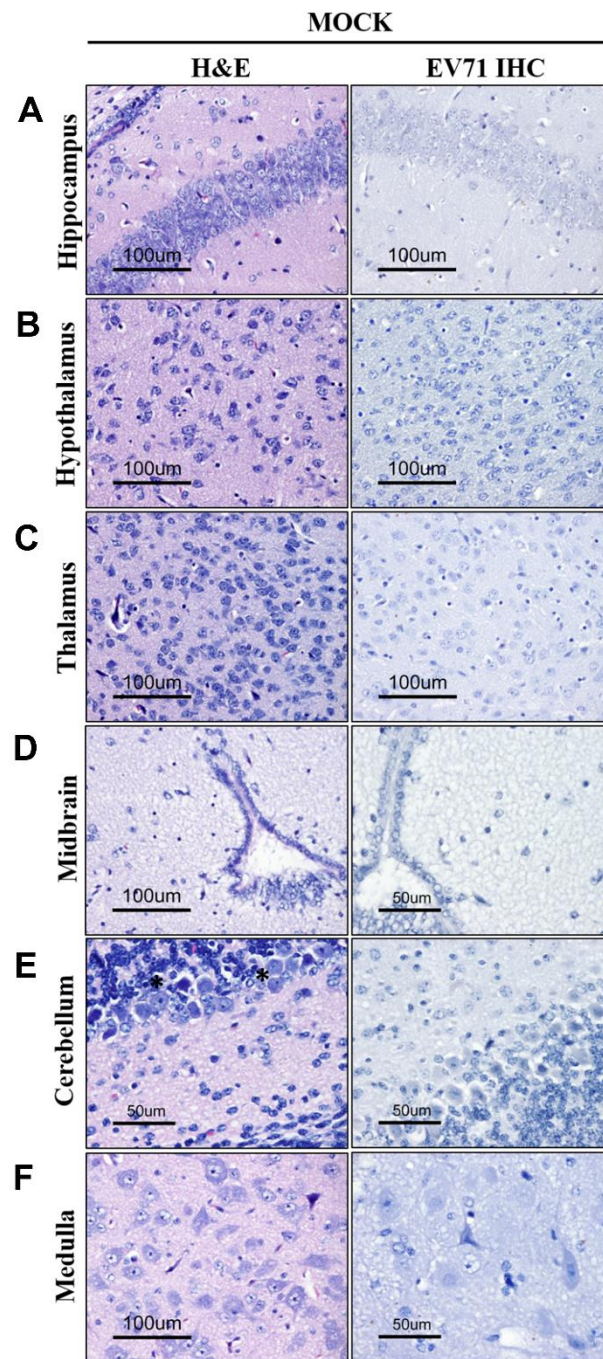

192

193

194

195 **Representative images of brain coronal sections from mock-inoculated healthy mice**

196 Coronal sections (5µm) of hippocampus (A), hypothalamus (B), thalamus (C), midbrain (D),  
197 cerebellum (E), and medulla (F) derived from healthy control mice sacrificed at the same day as  
198 Class-IA and Class-IB mice. Tissues were stained with Hematoxylin & Eosin (H&E) for  
199 histopathological examination; or labelled with anti-EV-A71 sera (EV71 IHC) for virus antigen  
200 localization. Note the regular morphology of Purkinje cells (*black asterisks*).

201

202

203

204

205

206

207

208

209

210

211

212

213

214

215

216

217

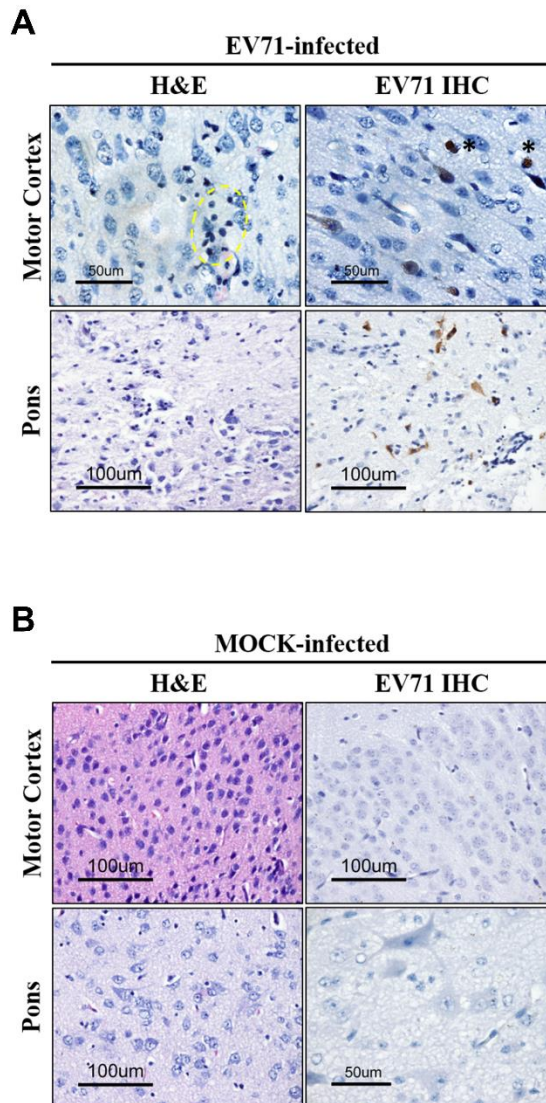

219

220 **Comparable histopathology and viral antigen distribution between Class-IA and Class-IB**  
 221 **mice brains**

222 Coronal sections (5µm) of motor cortex and pons derived from either Class-IA or Class-IB (A) or  
 223 mock-infected control mice (B). Sections were stained with Hematoxylin & Eosin (H&E) for  
 224 histopathological examination; or labelled with anti-EV-A71 sera (EV71 IHC) for virus antigen  
 225 localization. Note the presence of cellular infiltrate (*yellow circle*) and neuronal necrosis (*black*  
 226 *asterisks*).

227 **Figure S10**

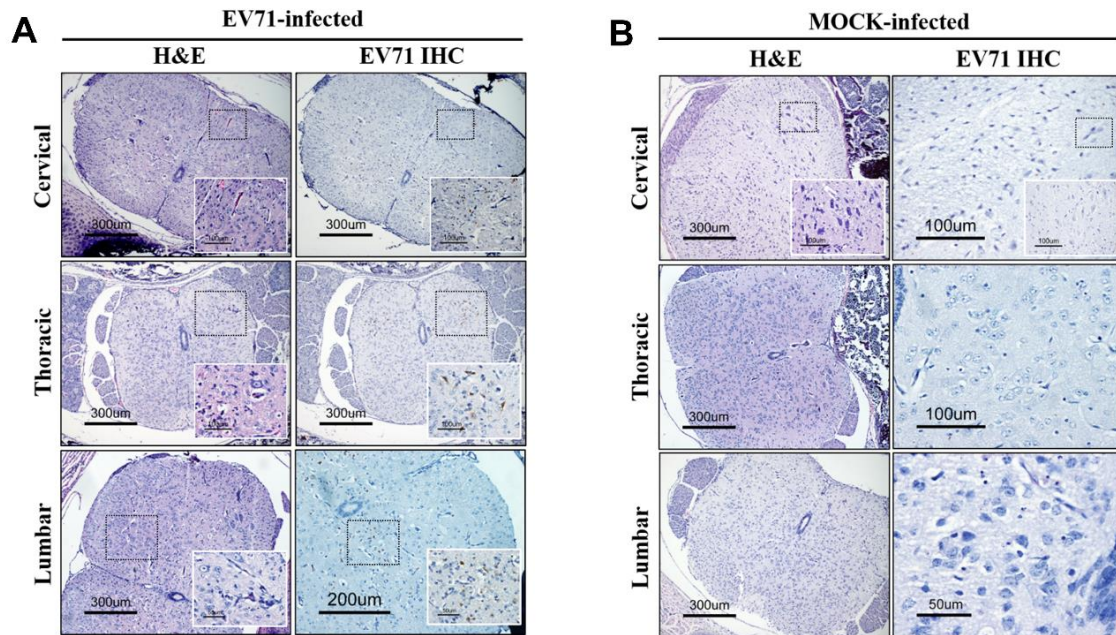

228

229 **Lesions and viral antigens observed in spinal cord sections of EV71:TLLmv-infected mice**

230 Representative images of coronal sections (5 $\mu$ m) of various spinal cord regions collected from  
231 either Class-IA or Class-IB mice (**A**) or mock-infected animals (**B**). Sections were stained with  
232 Hematoxylin & Eosin (H&E) for histopathological examination; or labelled with anti-EV-A71  
233 sera (EV71 IHC) for virus antigen localization. Boxed areas are shown magnified in the respective  
234 insets.

235

236

237

238

239

240

241



242 **Figure S11**

243

**A**

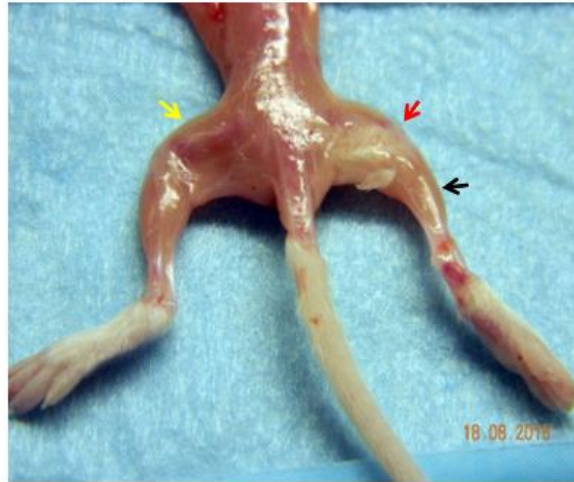

**B**

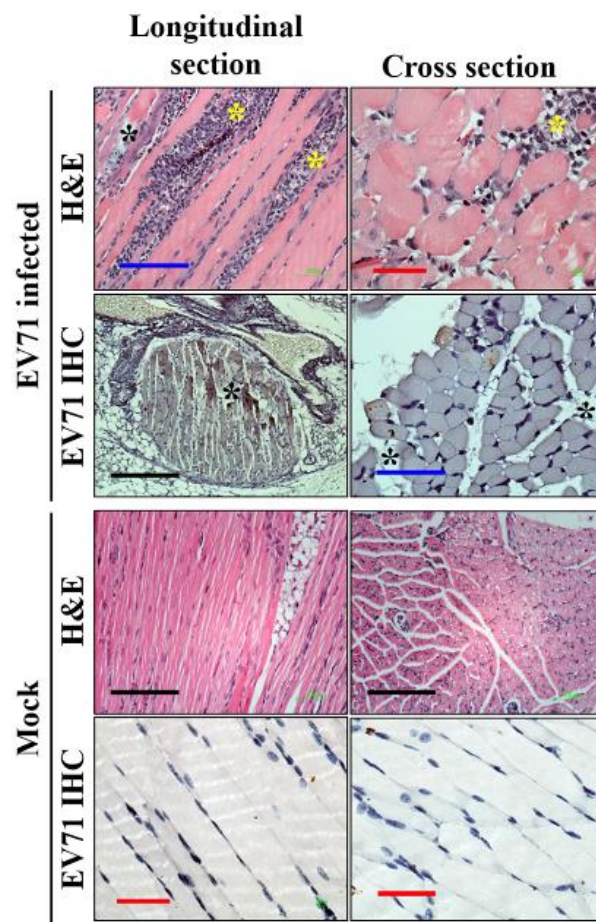

244

245 **Viral replication in the limb muscles evident in I.M.-inoculated mice**

246 (A) Representative image of hind limb (HL) gross pathology at necropsy revealing muscle necrosis  
247 (*red arrow*) in the right thigh above the inoculation site (*black arrow*) in comparison to normal  
248 muscle tissue (*yellow arrow*). (B) Representative images of transverse and longitudinal tissue  
249 sections (5µm) of the right HL of infected and sham-infected (Mock) control mice. Sections were  
250 stained with Hematoxylin & Eosin (H&E) for histopathological examination, or labelled with anti-  
251 EV-A71 sera (EV71 IHC) for virus antigen localization. Note evidence of severe inflammation  
252 with massive leukocyte infiltration (*yellow asterisks*) and muscle necrosis (*black asterisks*).  
253 Images are shown at different magnifications; Black bar=200µm; Blue bar=100µm; Red  
254 bar=50µm.
